# Supplementary material for: Computational studies of anaplastic lymphoma kinase mutations reveal common mechanisms of oncogenic activation
Source: PubMed Central journal article supplement — Proc Natl Acad Sci U S A. 2021 Mar 4;118(10):e2019132118. doi: 10.1073/pnas.2019132118 (PMC7958353; doi:10.1073/pnas.2019132118), 2021-03-04
Supplement: pnas.2019132118.sapp.pdf [file pnas.2019132118.sapp.pdf]

1

## 2 **Supplementary Information for**

### 3 **Computational Studies of Anaplastic Lymphoma Kinase Mutations Reveal Common**

### 4 **Mechanisms of Oncogenic Activation**

5 **Keshav Patil, Earl Joseph Jordan, Jin H. Park, Krishna Suresh, Courtney M. Smith, Abigail A. Lemmon, Yaël P. Mossé, Mark A.**  
6 **Lemmon\*, Ravi Radhakrishnan\***

7 **Corresponding Author Names. Mark A. Lemmon, Ravi Radhakrishnan**  
8 **E-mail: [mark.lemmon@yale.edu](mailto:mark.lemmon@yale.edu); [rradhak@seas.upenn.edu](mailto:rradhak@seas.upenn.edu)**

#### 9 **This PDF file includes:**

- 10     Supplementary text
- 11     Figs. S1 to S6
- 12     Table S1
- 13     References for SI reference citations

## 14 Supporting Information Text

### 15 1. Experimental Methods

16 **A. Plasmid Construction.** DNA encoding kinase domain residues 1090-1416 of human ALK was amplified by using primers that  
17 included an N-terminal hexahistidine tag and SpeI/NotI restriction sites. Mutations were introduced using the QuikChange  
18 method (Stratagene), and the PCR product was subcloned into pFastBac1 for protein expression in Sf9 cells. For focus  
19 formation assays, full-length ALK variants were subcloned into the pcDNA3.1(-) vector (Invitrogen).

20 **B. Recombinant protein expression and purification.** *Spodoptera frugiperda* Sf9 cells at  $1.5 - 2 \times 10^6$  /ml were infected with  
21 recombinant baculovirus, and harvested by centrifugation after 3 days. Cells expressing histidine-tagged ALK variants were  
22 lysed by sonication in 100ml of lysis buffer (50 mM sodium phosphate buffer, pH 8.0, 300 mM NaCl, 10mM imidazole, 4mM  
23  $\beta$ -mercaptoethanol, and protease inhibitor cocktail (Roche)). After centrifugation at 40,000 x g for 30 minutes to remove  
24 insoluble cell debris, the supernatant was incubated with Ni-NTA agarose beads (Qiagen) for 1 hour at 4° C. The Ni-NTA  
25 beads were washed with 50 column volumes of lysis buffer, pH 8.0 containing 20mM imidazole and bound ALK TKD protein  
26 was eluted in lysis buffer, pH 8.0 containing 300mM imidazole. Eluted ALK TKD protein was incubated with 1 $\mu$ M YopH  
27 phosphatase for 12 h at 4° C to reverse autophosphorylation that occurred during expression. YopH was then removed using a  
28 cation exchange column after reducing NaCl concentration to 100 mM. Eluted protein was then further purified using a butyl  
29 sepharose HP column (GE Healthcare) equilibrated with 1M (NH<sub>4</sub>)<sub>2</sub>SO<sub>4</sub>, 25mM HEPES pH 7.0, 150 mM NaCl and 2mM  
30 DTT (HIC buffer A), eluting with a 20 column volume linear gradient to 0 M (NH<sub>4</sub>)<sub>2</sub>SO<sub>4</sub>, 25mM HEPES pH 7.0, 150 mM  
31 NaCl and 2mM DTT (HIC buffer B). ALK TKD protein was finally subjected to a size exclusion chromatography step using a  
32 Superdex 200 column (GE Healthcare) equilibrated in 25 mM HEPES pH 7.4, 150 mM NaCl, 4 mM DTT.

33 **C. Peptide phosphorylation assays.** In vitro kinase assays measuring  $\gamma$ -<sup>32</sup>P incorporation into peptide substrate were performed  
34 as described (1). The substrate was a peptide mimic of the ALK activation loop with sequence: biotin- ARDIYRASYYRKG-  
35 GCAMLPVK (CanPeptide). Enzyme concentrations for unphosphorylated ALK-TKD variants were fixed at 50nM. Under  
36 these assay conditions, reaction rates were linear with respect to enzyme concentration and time. Assays were performed in  
37 100 mM HEPES pH 7.4, 150 mM NaCl, 2mM DTT, 10 mM MgCl<sub>2</sub> and 0.5 mg/ml BSA at 25° C.  $k_{cat}$  values were measured  
38 by varying peptide concentration from 0.015625 mM to 2mM at excess ATP (2mM). Samples were taken at each time point,  
39 spotted onto P81 Ion Exchange Cellulose Chromatography paper (Reaction Biology Corp) and quenched with 0.5 % phosphoric  
40 acid. Liquid scintillation was used to measure incorporated radioactivity on each paper filter. Initial rates were all determined  
41 from the linear portion of the enzyme reaction (when substrate depletion or product formation is < 10 % ), normalized for  
42 enzyme concentration, and fit to the Michaelis-Menten equation ( $v_o = v_{max}[S]/(K_m+[S])$ ) using GraphPad Prism 5.0.

43 **D. Focus formation assays.** For focus-formation assays, full-length ALK variants were subcloned into the pcDNA3.1 (-)  
44 (Invitrogen). Low-passage (typically < 15) NIH 3T3 cells at approximately 60 % to 70 % confluence were transfected with  
45 full-length mutated ALK constructs using Lipofectamine 2000 (Invitrogen). After 2 days of recovery, transfected NIH3T3 cells  
46 were divided into 2 groups and plated. The first (focus formation) group was plated on 10-cm dishes and left to reach full  
47 confluence and to form foci in DMEM with GlutaMaX with 5 % calf serum. For the second (colony formation) group, serially  
48 diluted cells were plated in wells of 6 plates in DMEM with GlutaMax with 10 % calf serum and 0.5 mg/ml G418 to select  
49 colonies for counting.

50 Medium was then changed every 3 days until foci and colonies were formed, which typically takes 2-3 weeks. Cells were  
51 then fixed in 3.7 % formaldehyde in phosphate-buffered saline (PBS) for 5 minutes and then stained with 0.05 % crystal  
52 violet in distilled water for 30 minutes. Data are reported as a transformation index, which is the number of foci corrected  
53 for transfection efficiency (estimated by the count of G418-resistant colonies), and normalized to a parallel assessment of  
54 transformation by the activating F1174L mutation, which was given the arbitrary transformation index of 1.0. Each independent  
55 experiment was performed in triplicate, and mean values are reported with standard deviation.

### 56 2. Computational Methods

57 **A. Molecular Dynamics Simulations.** Simulations and analysis were carried out using the BioPhysCode software suite (2). The  
58 initial structures of ALK were as previously reported (3). All homology models were constructed using MODELLER (4) and  
59 all mutations were introduced using a BioPhysCode Automacs routine based on MODELLER. The inactive wild-type ALK  
60 TKD structure (residues 1096-1399) was taken from PDB entry 3LCS (5). Missing residues 1084-1095 and 1400-1405 were  
61 added to the model based on PDB entry 4FNW using MODELLER. Mutated structures were generated using MODELLER by  
62 making point mutations to the modified inactive wild-type model. A homology model of active ALK TKD was generated with  
63 MODELLER, using as the primary template the active insulin receptor TKD structure (PDB entry 1IR3), with which ALK  
64 TKD shares 46% sequence identity. Residues 1097-1399 were modeled from 3LCS, whereas residues 1084-1096 and 1400-1405  
65 were again modeled from 4FNW. All structures were modeled without bound substrate. Simulations were run with Automacs  
66 using GROMACS (6) with the CHARMM27 force field (7) with TIP3P explicit solvent (8) in a periodic water box with at least  
67 12 Å between the protein and box edge. An ionic concentration of 0.15 M NaCl was used and the final charge of the full system  
68 was zero. Minimization was carried out using steepest descent and the system was equilibrated first at constant volume, then  
69 at constant pressure using Berendsen thermostat (9) before production MD simulations were carried out constant pressure

70 using Parinello-Rahman (10). Equilibration and production MD runs were carried out at constant temperature using velocity  
 71 rescaling (11), with linear center of mass motion removal. LINCS (12) was used to constrain all bonds during equilibration  
 72 and hydrogen bonds were constrained during production MD. Particle mesh Ewald electrostatics (3) was used to account for  
 73 long-ranged interactions (13). Simulations were run for a total of 101 ns and two replicates were performed for each simulation.

74 **B. Molecular Dynamics Analysis.** Analysis was performed, unless otherwise noted, on the last 100 ns and the two replicates  
 75 were averaged together. Structures were sampled from each trajectory at 20 ps intervals, resulting in a total of 5001 structures  
 76 for analysis. Plotting was performed with Omnicalc using matplotlib (14).

77 **B.1. Hydrogen bond occupancy.** Each amino acid is considered to have a maximum of 3 possible hydrogen bonds: a main chain  
 78 donor, a main chain acceptor, and the side chain — meaning that some residues such as Arg or Asp can have more than  
 79 one side chain hydrogen bond in a single frame; however, bonds are counted uniquely so that this could only happen if e.g.  
 80 Arg-*i* and Asp-*j* side chains make both possible hydrogen bonds. For each structure in a trajectory and for each bond (see  
 81 Fig. S1) the hydrogen bond occupancy (**O**) was calculated by dividing the number of frames with a hydrogen bond is observed  
 82 by the total number of frames. After computing the occupancy for each residue *i* in the inactive WT (**O**<sub>WT,*i*</sub>) and residue  
 83 *i* in the inactive mutant (**O**<sub>MUT,*i*</sub>) the occupancy difference in the mutant *MUT* for residue *i* (**Δ**<sub>MUT,*i*</sub>) was calculated  
 84 as **Δ**<sub>MUT,*i*</sub> = **O**<sub>MUT,*i*</sub> - **O**<sub>WT,*i*</sub>. For each residue *i*, if **Δ**<sub>MUT,*i*</sub> > *threshold*, then **Δ**<sub>MUT,*i*</sub> is added to an accumulator  
 85 (**Δ**<sub>MUT,Total</sub>). Here *threshold* is set to 0.75 and a mutation considered to have a different occupancy than WT if **Δ**<sub>MUT,Total</sub>  
 86 is nonzero and exceeds a second threshold. This threshold is varied to get a sensitivity of the chosen value to the prediction  
 87 accuracy as discussed in the main text.

88 **B.2. RMSD analysis.** RMSD was computed for αC helix and activation loop residues after aligning the rest of the C<sub>α</sub> carbon  
 89 atoms with the active and the inactive reference states. The temporal RMSD plots were generated for each mutant system  
 90 as depicted in the example plots in Fig. S2. A threshold standard deviation of RMSD change of > 2 Å either in the αC  
 91 helix or the activation loop in a given system was scored as activating. The resultant analysis yielded similar BACC to that  
 92 obtained using hydrogen bond occupancy. Since the hydrogen bond occupancy can yield residue level information, we utilize  
 93 that method in the final analysis and comparison to experiments.

94 **C. Metadynamics.** Well tempered metadynamics (15) (WTMD) was used to sample the large scale configurational space  
 95 between the inactive and the active configurations of ALK to assess conformational the conformational changes in the kinase  
 96 subdomains that provide distinguishable features (mainly the activation loop and the αC helix), with the active configuration  
 97 having α C-in and the activation loop being extended, and the inactive active configuration of ALK having α C-out and the  
 98 activation loop not being extended: inactive configuration of ALK (3). The biased simulations were performed using PLUMED  
 99 2.3.5 patched with GROMACS 5.0.7. Metadynamics accelerates rare events along certain collective variables (CVs) that are  
 100 functions of positional coordinates. Here we use a simple geometry based CV or path based CV: RMSD to the active structure  
 101 of ALK as CV1 and RMSD to inactive structure of ALK as CV2. The RMSD is calculated based on only the non-translational  
 102 and non-rotational motion of the alpha carbon atoms in the protein backbone. Metadynamics involves adding an external  
 103 history dependent Gaussian potential for the system to be able to cross the barrier.

$$104 \quad V(\vec{s}, t) = \sum_{k\tau < t} W(k\tau) \exp\left(-\sum_{i=1}^d \frac{(s_i - \bar{s}_i(k\tau))^2}{2\sigma_i^2}\right) \quad [1]$$

105 To parallelize the metadynamics calculations, we use four walkers meaning four parallel simulations that sample the  
 106 configurational space simultaneously and are cognizant of the deposited Gaussian potentials by other walkers on the CV grid  
 107 space through a file sharing system of PLUMED. Here in eq 1,  $\sigma_i$  is the width of the Gaussian for the CV  $s_i$ ,  $W$  represents the  
 108 height of the Gaussian and  $\tau$  is the Gaussian deposition stride. WTMD uses decaying Gaussian height to ensure smoother  
 109 convergence.

$$110 \quad W(k\tau) = W_o \exp\left(-\frac{V(\vec{s}, k\tau)}{k_B \Delta T}\right) \quad [2]$$

111 In the larger time limits, the free energy for the CV space is obtained as,

$$112 \quad V(S, t \rightarrow \infty) = -\frac{\Delta T}{T + \Delta T} F(S) + C \quad [3]$$

113 We set in the PLUMED script, the energy in kcal/mol and length in Å. The parameters used in this study to perform  
 114 WTMD are: bias factor  $\gamma = \frac{T + \Delta T}{T} = 20$ , height = 0.6 and pace = 500.

115 **C.1. Convergence of free energy profile obtained through metadynamics.** The CVs that we have employed, CV1:RMSD to active  
 116 and CV2: RMSD to inactive span a very large configurational space, but is required to capture the transition between the  
 117 active and the inactive states. Initially, we utilized the configurations that resulted from equilibration of the structures from  
 118 PDB/homology modeling as the inactive and active reference structures for CV1 and 2. After a first round of metadynamics,  
 119 we identified the zones corresponding to the inactive and active states and then utilized representative structures from these

### ALK WT inactive Hbonds contact map

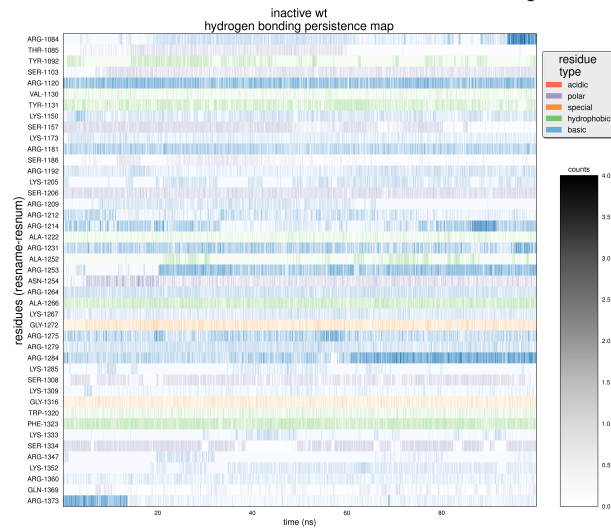

### ALK WT inactive replicate 400 ns Hbonds contact map

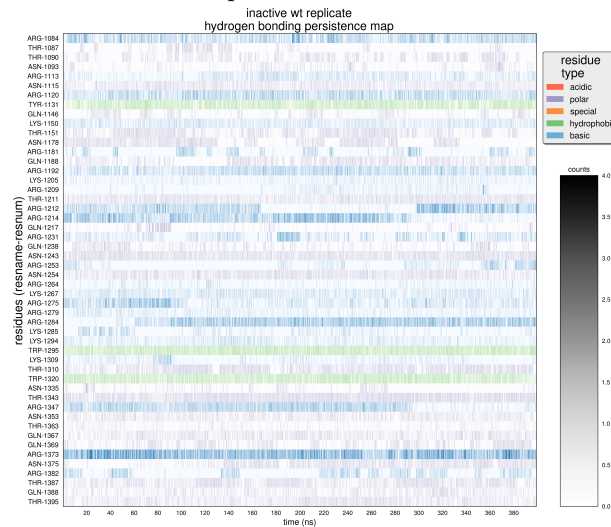

**Fig. S1.** Inactive hydrogen bond contact maps. Residues are colored by type of side chain. Darkness is determined by the number of hydrogen bonds a residue participates in during a single frame. Backbone and side chain contributions are taken together. Only residues that participate in at least one hydrogen bond for at least 10% of frames are shown.

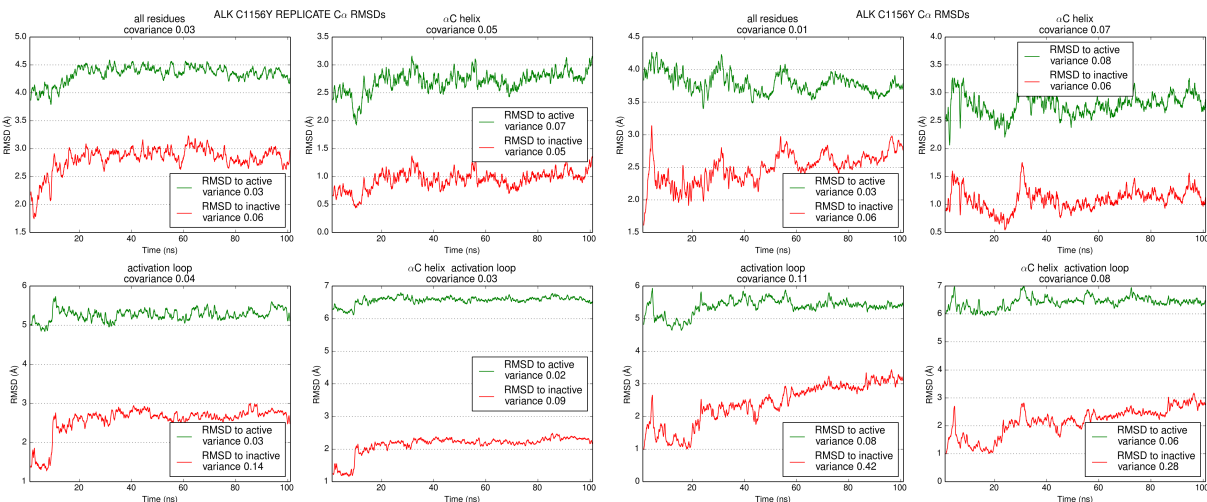

Fig. S2. RMSD evolution of the C1156Y mutant as an example in two (replicate) trajectories. Overall RMSD as well as those of  $\alpha$ C helix and the activation loop regions are shown.

120 zones in the definition of the CVs. This one-step iterative procedure led to superior convergence of the landscapes. The choice  
 121 of the CVs and the iterative procedure culminates in a very long biased simulation time. Hence, we simulate to ensure the  
 122 convergence of certain zones of interest in the free energy landscape to with less than 0.5 kcal/mol for 100 ns based on evolution  
 123 of the free energy of these zones or states according to,

$$124 \quad F_s = -k_B T \log \left( \int \int e^{-\beta \hat{F}(s_1, s_2)} ds_1 ds_2 \right), \quad [4]$$

125 where  $F_s$  is the free energy of the state,  $\hat{F}(s_1, s_2)$  is the free energy of the value at that collective variable coordinates  $(s_1, s_2)$ .  
 126 These zones represent the transition from the inactive-like to active-like configurations of ALK as depicted in the main text.  
 127 The nature of metadynamics is such that it discourages the system from visiting more frequently visited regions. However, a  
 128 convergence analysis needs to be performed to ensure reproducibility. We perform such an analysis in Fig. S3.

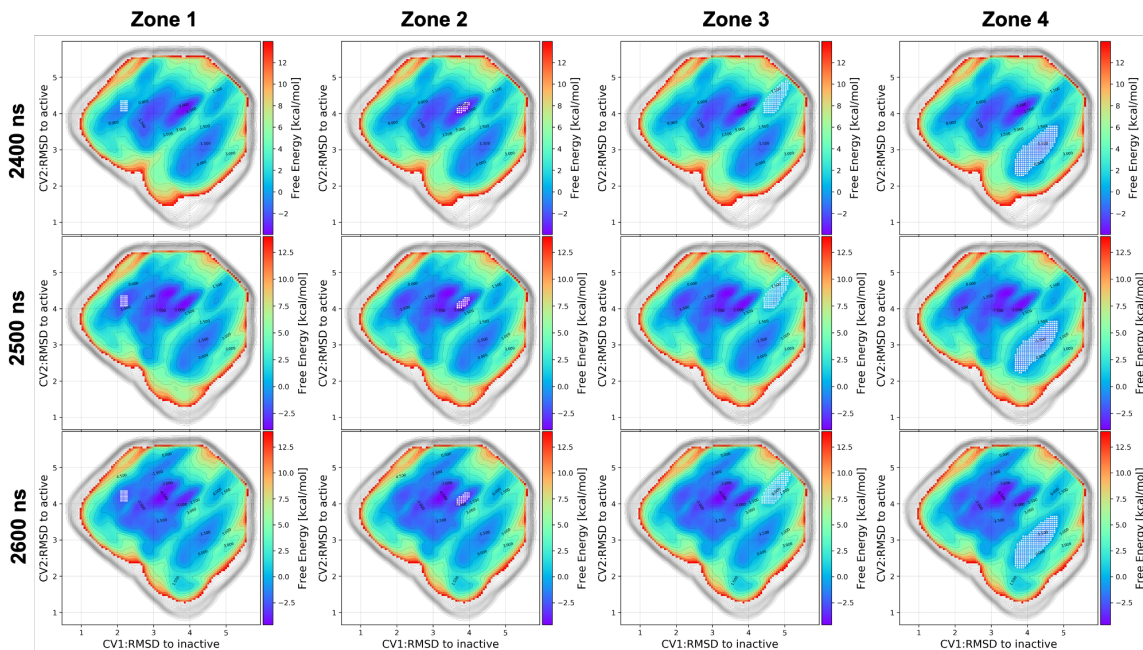

Fig. S3. We compute and depict the evolution of the quantity  $F_{z1} - F_{z4}$  or free energy for zones 1-4 (columns) using eq 4. The rows represent the free energy values after 2400 (top), 2500 (middle), and 2600 (bottom) ns of metadynamics, respectively. The converged values of the free energies are tabulated in the main text.

129 A summary of the four zones is depicted in Fig. S4. The zones are identified as regions in the free energy landscape within  
 130  $5k_B T$  of the minimum free energy value in that zone.

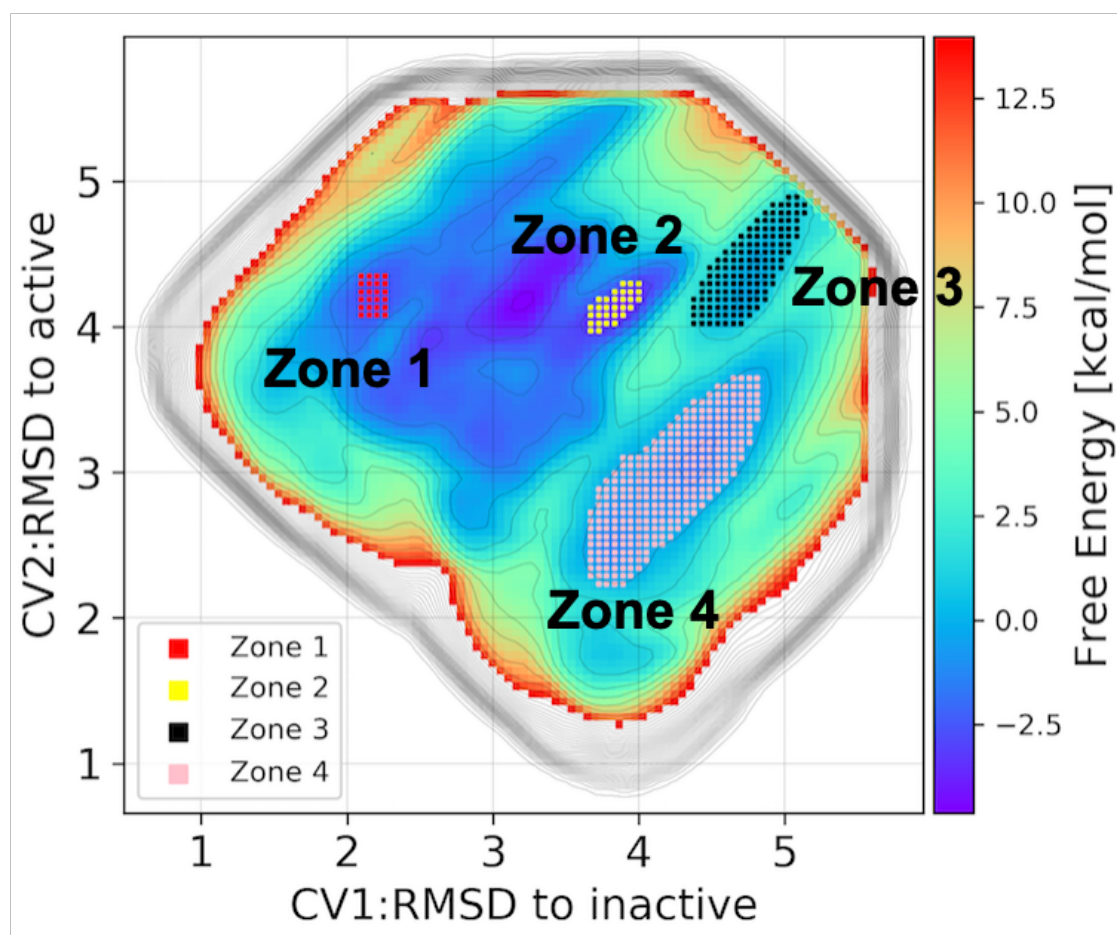

Fig. S4. Four converged zones identified on the free energy landscape subjected to further analysis.

131 **D. Machine Learning Algorithm.**

132 **D.1. Curation of Dataset.** A pan-kinase mutation dataset was constructed via text mining of the UniProt database using a Perl  
 133 script. The resulting data set was validated by searching the literature for a subset of the entire dataset to ensure that class  
 134 assignments were correct. The final set used in this work contained 829 total point mutations, with 230 positive, activating  
 135 mutations, and 599 negative, non-activating mutations. For each mutation, a feature vector with 59 elements was generated,  
 136 addressing chemical properties of the wild type and mutant residues.

137 **D.2. Construction of Feature Vectors.** For each mutation, a feature vector of the following values was constructed. This leads to a  
 138 feature vector for each mutation with 59 elements. Each element of the resulting vectors is normalized so that all values are in  
 139  $[-1,1]$ . A large number of the elements will be zero for each mutation. The following is a list of all the features:

- 140 1. Wild type residue (one feature element for each of the 20 amino acids)
- 141 2. Mutated residue (one feature element for each of the 20 amino acids)
- 142 3. Wild type residue type (from aliphatic, acidic, basic, aromatic, and polar)
- 143 4. Mutated residue type (from aliphatic, acidic, basic, aromatic, and polar)
- 144 5. Difference between wild type and mutated residue for following:
  - 145 (a) Kyte-Doolittle hydropathy
  - 146 (b) Free energy of solvation
  - 147 (c) Normalized van der Waals radius
  - 148 (d) Polarity difference
  - 149 (e) Charge difference

- 150 6. Whether the mutation falls in one of the following kinase subdomains:
- 151 (a) nucleotide binding loop
- 152 (b)  $\alpha$ C helix
- 153 (c) catalytic loop
- 154 (d) activation loop

155 **D.3. Construction of Data Matrix and Training.** Feature vectors were generated for each of the 829 mutations via a python script that  
156 extracted features from the data. The data file has the following information for each kinase.

- 157 1. The name of the kinase (BRAF, ALK, etc.)
- 158 2. The wild type residue (before point mutation)
- 159 3. The mutated residue (after point mutation)
- 160 4. The location of the point mutation (residue number)
- 161 5. Label (+1: activating, -1: non-activating)

162 A data matrix was generated with the features (normalized numerical values) and labels for each mutation. Data were  
163 divided into a training set and a test set. The test set consists of all 41 ALK mutations in Fig. 4A. The training set consists of  
164 all of the other 784 mutations. Since the data were imbalanced, the SMOTE algorithm, for up sampling of the minority class,  
165 was performed on the training set so that it consisted of an equal number of activating and non-activating mutations. SMOTE  
166 was only applied on the training set to prevent overfitting (16–18). 5-fold cross validation was then performed on the training  
167 set to determine the optimal hyperparameters that maximized both the f1 score and the ROC AUC score. The following  
168 algorithms were used in this study: Support Vector Machine (SVM), Logistic Regression, Neural Net, and Random Forest.  
169 The data were utilized to determine the optimal hyperparameters. Namely, the hyperparameters were tuned in cross-validation.  
170 After training the models using the training data and optimized hyperparameters, the model was evaluated on the test data.

171 **D.4. Support Vector Machine (SVM).** Model Choice: The Support Vector Machine (SVM), with the Radial Basis Function (RBF)  
172 kernel, was chosen since the data were numerical and the number of samples was much greater than the dimensions of the feature  
173 space. Model Training and Hyperparameter Search: The training data were utilized to determine the optimal hyperparameters.  
174 SVM has a number of parameters that can be optimized. For the SVM RBF, the error penalty,  $C$ , and the Gaussian width  
175  $\gamma$  can be optimized. The error penalty  $C$  controls how smooth the decision surface is, with larger values of  $C$  leading to an  
176 increasingly jagged boundary that attempts to classify every example correctly. The Gaussian width  $\gamma$  controls how large of  
177 a region in feature space (or any mapping of feature space) that the training examples take up, with larger values meaning  
178 training examples are ‘felt’ in a smaller region. Both  $C$  and  $\gamma$  can be tuned in cross-validation (19). To this end, a grid  
179 search was implemented over all combinations of values of  $\gamma \in [1 \times 10^{-5}, 1 \times 10^4]$  increasing by a factor of 10 in each iteration,  
180  $C \in \{0.01, 0.1, 1, 2, 3, 4, 5\}$  for loss functions that maximize one of F1, ROC AUC. The F1 score is a weighted average of the  
181 precision and recall, both of which are defined later when discussing the measures used in evaluating the performance of the  
182 model. The F1 score reaches its best value at 1 and worst score at 0. The ROC is a plot of the false positive rate (x-axis)  
183 versus the true positive rate (y-axis) for a number of different candidate threshold values between 0.0 and 1.0. ROC AUC  
184 calculates the area under the ROC curve; the best possible AUC is 1 while the worst is 0.5 (the 45 degrees random line). F1  
185 and ROC AUC are more representative loss functions, than accuracy, since the data are imbalanced.

186 The grid search was conducted by performing 5-fold cross validation. The training data set was shuffled randomly and then  
187 split into 5 groups. For each unique group, that group was taken as the test data set and the remaining groups as a training  
188 data set. A model was fit on the training set and evaluated on the test set. The model was discarded after retaining the f1 and  
189 ROC AUC scores and the process was repeated for each unique group. The skill of the model with that particular combination  
190 of hyperparameter values was then summarized using the sample of model evaluation scores. For the training set used here,  
191  $C = 5, \gamma = 0.1$ , kernel=rbf were found to be the hyperparameters that maximized the ROC AUC and F1 loss functions. A plot  
192 of the ROC AUC scores for combinations of Gamma and C values tested during cross validation is depicted in Fig. S5. In  
193 addition, we performed a statistical test (F-test) to determine the relevance of the features in the ML algorithm S6. The F-test  
194 is a statistical test used to compare between models and to check if the difference in performance is significant. In this case,  
195 iterations of hypothesis testing are done where one model, X, contains “n” features, and model Y has “n+1” features. The  
196 least squares errors in both models are compared and a p-value is calculated to determine whether the difference in errors  
197 between model X and Y are significant or introduced by chance. A significant difference means that the feature added provided  
198 a meaningful contribution to the performance and improvement of the ML algorithm.

199 **D.5. Neural Network.** Model Choice: The neural net was constructed using the Keras framework. The optimizer was chosen to be  
200 “stochastic gradient descent” and the loss function was designated as “binary cross entropy.” Given the size of the data set  
201 and the number of features at our disposal, a 3 layered neural net was constructed. The first layer has 8 units and an input  
202 dimension of 59; the second layer has 8 units and the “tanh” activation function; the third layer has 1 unit and the “sigmoid”  
203 activation function. The max epoch number was set to 500 and the batch size was set to 32 (20).

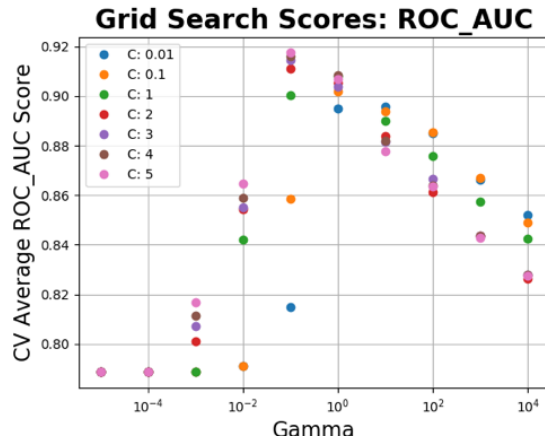

Fig. S5. Plot of ROC AUC scores for combinations of  $\gamma$  and  $C$  values tested during cross validation. Optimal combination of parameters found to be:  $C = 5$ ,  $\gamma = 0.1$ , 'kernel'='rbf'.

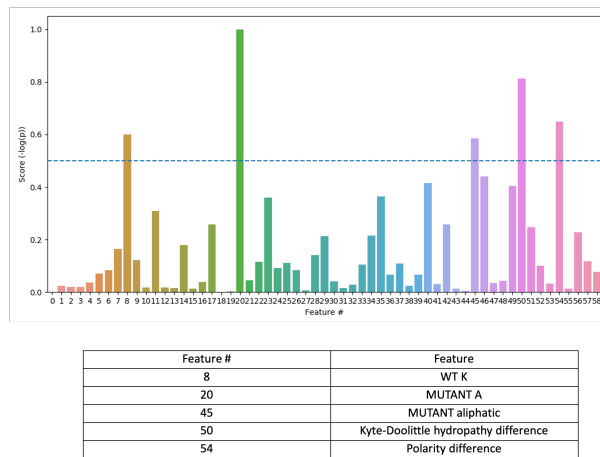

Fig. S6. (top) F-Test Scores for features in SVM Algorithm. Dotted Line drawn at 0.5 to highlight most important features. (bottom) Features with greatest scores from F-test analysis

204 **D.6. Logistic Regression.** Model Training and Hyperparameter Search: The training data was utilized to determine the optimal  
 205 hyperparameters. The following were the parameters that can be optimized for Logistic Regression: solver, algorithm to use in  
 206 the optimization problem; C, inverse of regularization strength; and, multi-class, where if 'ovr' is chosen, a binary problem  
 207 is fit for each label and if 'multinomial' is chosen, the loss minimized is the multinomial loss fit across the entire probability  
 208 distribution, even when the data is binary. All of these parameters can be tuned through cross-validation (21). To this end, a  
 209 grid search was implemented over all combinations of values of solver  $\in \{0.01, 0.1, 1, 2, 3, 4, 5\}$ , multi-class  $\in \text{'ovr', 'multinomial'}$   
 210 ], and  $C \in \{0.001, 0.01, 0.1, 1, 10, 100, 1000\}$ . For the training set used here, 'solver' = 'newton-cg', 'multi-class' = 'multinomial',  
 211 'C' = 100 were found to be the hyperparameters that maximized the ROC AUC and F1 loss functions.

212 **D.7. Random Forest.** Model Training and Hyperparameter Search: The training data was utilized to determine the optimal  
 213 hyperparameters. The following were the parameters that can be optimized for Random Forest: n-estimators, the number  
 214 of trees in the random forest; max-features, the number of features to consider at every split; max-depth, the maximum  
 215 number of levels in each tree; min-samples-split, the minimum number of samples required to split a node; min-samples-leaf,  
 216 the minimum number of samples required at each leaf node; and, bootstrap, the method of selecting samples for training  
 217 each tree. All of these parameters can be tuned through cross-validation (22). Since this is a large hyperparameter space, a  
 218 randomized grid search was implemented. This means that not all parameter values are tried out, but rather a fixed number of  
 219 parameter settings is sampled from the specified distributions. This was done over all combinations of values of n-estimators  
 220  $\in [200, 2000]$  increasing by 180 in each iteration, max-features  $\in \text{'auto', 'sqrt'}$ , max-depth  $\in [10, 110] \cup \text{'None'}$  increasing by 9  
 221 each iteration, min-samples-split  $\in [2, 5, 10]$ , min-samples-leaf  $\in [1, 2, 4]$ , and bootstrap  $\in \text{[True, False]}$  for loss functions which  
 222 maximize one of [F1, ROC AUC]. For the training set used here, [n-estimators=1200,min-samples-split=10,min-samples-leaf=1,  
 223 max-features="sqrt",max-depth=None,bootstrap=True] were found to be the hyperparameters that maximized the ROC AUC  
 224 and F1 loss functions.



225 **D.8. Evaluation.** After training the models using the training data and optimized hyperparameters, the model can be evaluated  
 226 on the test data. Using the trained model, we made predictions on the labels (1: activating, -1: non-activating) of the  
 227 test set. The following measures are usually used in evaluating the performance of the model: TP = # of true positives,  
 228 TN = # of true negatives, FP = # of false positives, and FN = # of false negatives, where BACC = Balanced Accuracy,  
 229 TPR = True Positive Rate, TNR = True Negative Rate, TN = True Negative Rate, FPR = False Positive Rate, TPR =  
 230 True Positive Rate, TNR = True Negative Rate, and FNR = False Negative Rate. All ML implementations were executed  
 231 in Python. Here:  $TPR=TP/(TP+FN)$ ,  $FPR=FP/(FP+TN)$ ,  $FNR=1-TPR$ ,  $TNR=1-FPR$ ,  $BACC=(TPR+TNR)/2$ , and  
 232  $Accuracy=(TP+TN)/(TP+TN+FP+FN)$ .

233 **E. GitHub Repository.** The machine learning models, training data, and documentation are available for download from  
 234 <https://github.com/kksuresh25/Cancer-AI>

235 The molecular dynamics and metadynamics files are available for download from  
 236 [https://github.com/KesPatil/ALK\\_files\\_2021\\_PNAS.git](https://github.com/KesPatil/ALK_files_2021_PNAS.git)

### 237 3. Additional SI Figures and Tables

| ALK | H-bond donor                    | H-bond acceptor | # simulation bond is labile |
|-----|---------------------------------|-----------------|-----------------------------|
|     | Arg-1181 side                   | Glu-1197 side   | 47                          |
|     | Arg-1231 side                   | Glu-1384 side   | 40                          |
|     | Arg-1253 side                   | Asp-1249 side   | 33                          |
|     | Arg-1284 side                   | Asp-1163 side   | 30                          |
|     | Arg-1279 side                   | Asp-1163 side   | 23                          |
|     | Arg-1275 side                   | Asp-1276 side   | 22                          |
|     | Arg-1284 side                   | Asp-1276 side   | 21                          |
|     | Listed bonds/total labile bonds |                 | 216/390                     |

**Table S1. Labile hydrogen bonds: all listed H-bonds are between residue side chains (side) but main chains were also considered.**

### 238 References

- 239 1. Bresler SC, et al. (2011) Differential inhibitor sensitivity of anaplastic lymphoma kinase variants found in neuroblastoma. *Sci Transl Med* 3(108):108ra114.
- 240 2. (2020) Biophyscode. <https://biophyscode.github.io>.
- 241 3. Bresler SC, et al. (2014) Alk mutations confer differential oncogenic activation and sensitivity to alk inhibition therapy in neuroblastoma. *Cancer cell* 26(5):682–694.
- 242 4. Sali A, Blundell T (1994) Comparative protein modelling by satisfaction of spatial restraints. *Protein structure by distance analysis* 234(3):779–815.
- 243 5. Lee CC, et al. (2010) Crystal structure of the ALK ( anaplastic lymphoma kinase ) catalytic domain. *Biochemical Journal* 437:425–437.
- 244 6. Páll S, Kutzner C, Abraham MJ, Hess B, Lindahl E (2015) Tackling Exascale Software Challenges in Molecular Dynamics Simulations with GROMACS. *Proc. of EASC 2015 LNCS* 8579:3–27.
- 245 7. MacKerell AD, et al. (1998) All-Atom Empirical Potential for Molecular Modeling and Dynamics Studies of Proteins <sup>†</sup>. *The Journal of Physical Chemistry B* 102(18):3586–3616.
- 246 8. Jorgensen WL, Chandrasekhar J, Madura JD, Impey RW, Klein ML (1983) Comparison of simple potential functions for simulating liquid water. *The Journal of Chemical Physics* 79(2):926–935.
- 247 9. Berendsen HJC, Postma JPM, van Gunsteren WF, DiNola A, Haak JR (1984) Molecular dynamics with coupling to an external bath. *The Journal of Chemical Physics* 81(8):3684–3690.
- 248 10. Parrinello M, Rahman A (1981) Polymorphic transitions in single crystals: A new molecular dynamics method. *Journal of Applied Physics* 52(12):7182–7190.
- 249 11. Bussi G, Donadio D, Parrinello M (2007) Canonical sampling through velocity rescaling. *The Journal of Chemical Physics* 126(1):14101.
- 250 12. Hess B, Bekker H, Berendsen HJC, Fraaije JGEM (1997) Lincs: A linear constraint solver for molecular simulations. *Journal of Computational Chemistry* 18(12):1463–1472.
- 251 13. Essmann U, et al. (1995) A smooth particle mesh Ewald method. *The Journal of Chemical Physics* 103(19):8577–8593.
- 252 14. Hunter JD (2007) Matplotlib: A 2d graphics environment. *Computing In Science & Engineering* 9(3):90–95.
- 253 15. Barducci A, Bussi G, Parrinello M (2008) Well-tempered metadynamics: a smoothly converging and tunable free-energy method. *Physical Review Letters* 100(2):020603.
- 254 16. Chawla NV, Bowyer KW, Hall LO, Kegelmeyer WP (2002) Smote: Synthetic minority over-sampling technique. *J. Artificial Intelligence Research* 16:321–357.
- 255 17. Fernandez, A. GSHFCNV (2018) Smote for learning from imbalanced data: Progress and challenges, marking the 15-year anniversary. *Journal of Artificial Intelligence Research* 61:863–905.
- 256
- 257
- 258
- 259
- 260
- 261
- 262
- 263
- 264
- 265
- 266
- 267
- 268
- 269

- 270 18. Wang J, Xu M, Wang H, Zhang J (year?) Classification of imbalanced data by using the smote algorithm and locally  
271 linear embedding in *ICSP2006 Proceedings*.
- 272 19. (2020) Support vector machines. <https://scikit-learn.org/>; module= svm.
- 273 20. (2020) Keras: The python deep learning library. <https://keras.io/>.
- 274 21. (2020) Sklearn linear model logistic regression. <https://scikit-learn.org/>; module= sklearn linear model Logistic Regression.
- 275 22. (2020) sklearn ensemble random forest classifier. <https://scikit-learn.org/>; module= sklearn ensemble Random Forest  
276 Classifier.
